# Supplementary material
Source: PubMed Central journal article supplement (PMC3332101)
Supplement: NIHMS366342-supplement-supplement_1.pdf [file NIHMS366342-supplement-supplement_1.pdf]

e-Appendix Figure 1: Fibrate Availability in the United States and Canada

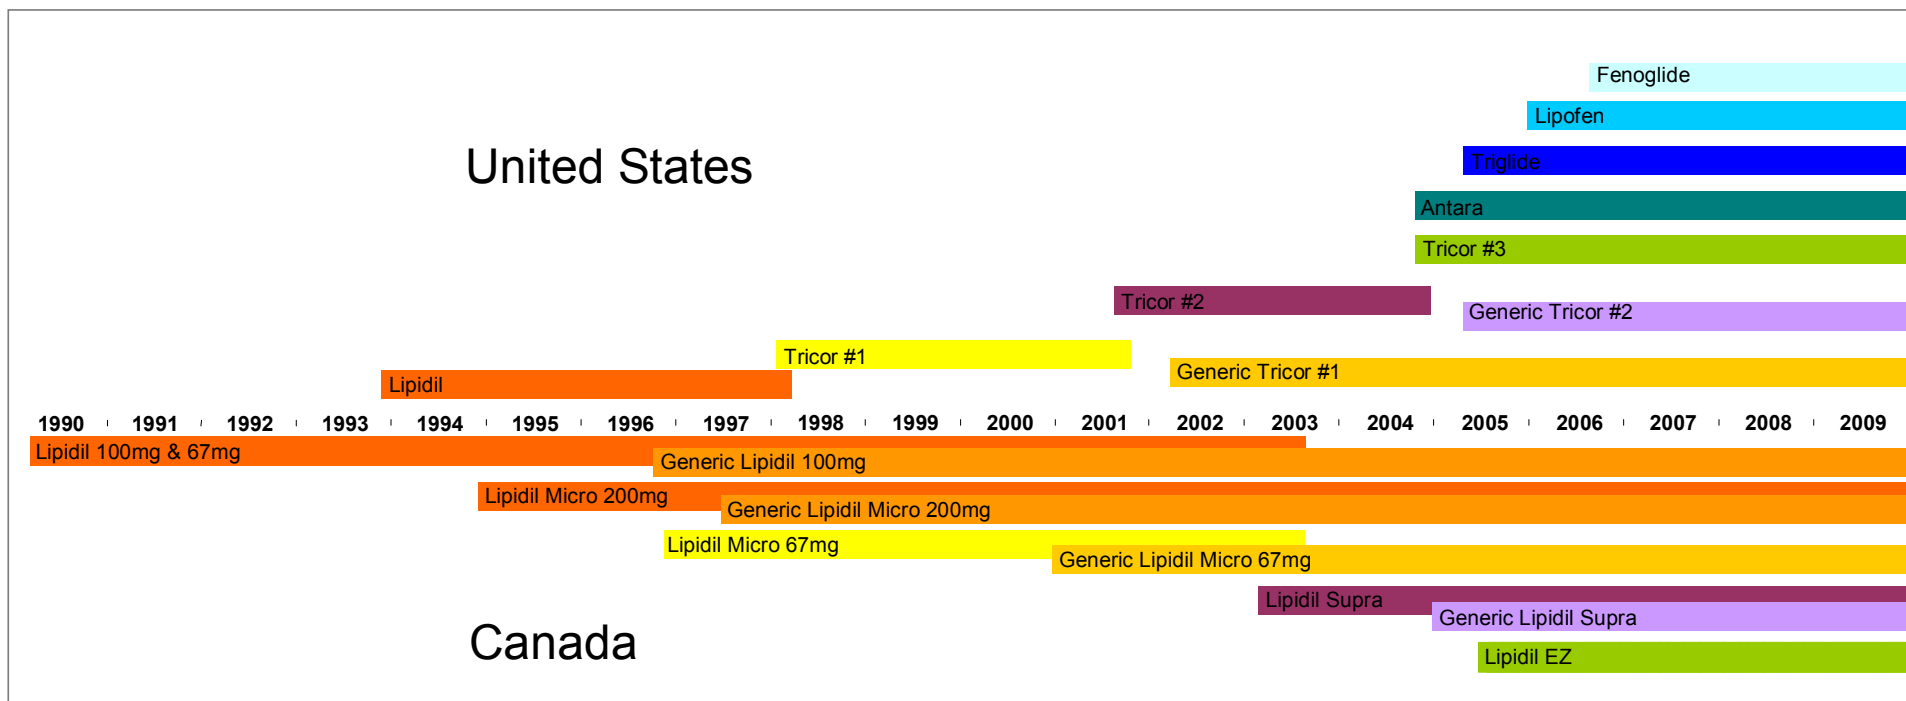

[www.fda.gov](http://www.fda.gov); <http://www.hc-sc.gc.ca/dhp-mps/prodpharma/databasdon/index-eng.php>

Note: color coding of products indicates the similar product available in each country
